# Supplementary material for: Geographic Structuring of the Plasmodium falciparum Sarco(endo)plasmic Reticulum Ca2+ ATPase (PfSERCA) Gene Diversity
Source: PubMed Central journal article supplement (PMC2828472; doi:10.1371/journal.pone.0009424), 2010-02-25
Supplement: pone.0009424.s004.pdf [file pone.0009424.s004.pdf]

**Supplementary Table . List of the mutations observed in *pfserca***

| Codon | nucleotide position mutation     | wild-type codon | mutant codon | Amino Acid                             | Isolate        | Country of origin of the isolate                                                                                                                                                                     | Reference                                 |
|-------|----------------------------------|-----------------|--------------|----------------------------------------|----------------|------------------------------------------------------------------------------------------------------------------------------------------------------------------------------------------------------|-------------------------------------------|
| 037*  | 110 G>A                          | AGA             | AAA          | R→K                                    | 7G8            | Brazil <sup>#</sup>                                                                                                                                                                                  | Tanabe 2004<br>Ferreira 2008              |
| 089   | 266 T>C                          | ATA             | ACA          | I→T                                    | Mad20<br>T9/94 | Papua New Guinea<br>Thailand<br>Vietnam                                                                                                                                                              | Tanabe 2004<br>Price 2004<br>Bertaux 2009 |
| 141*  | 421 T>G                          | TGG             | GGG          | W→G                                    |                | Senegal <sup>#</sup>                                                                                                                                                                                 | this work                                 |
| 229   | 685 G>A                          | GTA             | ATA          | V→I                                    |                | Zanzibar                                                                                                                                                                                             | Dahlström 2008                            |
| 243   | 727 C>T                          | CAT             | TAT          | H→Y                                    |                | Angola<br>Zanzibar                                                                                                                                                                                   | Menegon 2008<br>Dahlström 2008            |
| 252   | 756 T>C                          | GAT             | GAC          | <i>D→D</i>                             |                | Zanzibar                                                                                                                                                                                             | Dahlström 2008                            |
| 402** | 1204 T>G                         | TTA             | GTA          | L→V                                    | T9/96          | Senegal <sup>#</sup> , Brazil <sup>#</sup><br>Thailand<br>Senegal, Ghana,<br>Nigeria, Kenya,<br>Cameroon, Congo<br>Dem, Niger                                                                        | Tanabe 2004<br>Menegon 2008               |
| 421** | 1233 G>A                         | GGA             | GAA          | G→E                                    |                | French Guiana <sup>#</sup>                                                                                                                                                                           | this work                                 |
| 431** | 1262 G>A<br>?1291                | GAA             | AAA          | E→K                                    |                | Senegal <sup>#</sup><br>Senegal, Angola,<br>Ghana, Cote d'Ivoire,<br>Nigeria, Kenya, Congo<br>Dem, Madagascar,<br>Niger, China<br>Zanzibar, Tanzania,<br>Gambia, Liberia,<br>Malawi Sudan,<br>Uganda | Menegon 2008<br>Dahlström 2008            |
| 438** | 1313 C>A                         | GCT             | GAT          | A→D                                    | Mad20          | Papua New Guinea                                                                                                                                                                                     | Tanabe 2004                               |
| 441** | 1323 T>C                         | TAT             | TAC          | Y→Y                                    |                | French Guiana <sup>#</sup>                                                                                                                                                                           | this work                                 |
| 443** | 1329 C>T                         | GAC             | GAT          | <i>D→D</i>                             |                | French Guiana <sup>#</sup>                                                                                                                                                                           | this work                                 |
| 460   | 1380 T>C                         |                 |              | <i>N→N</i>                             |                | Vietnam                                                                                                                                                                                              | Bertaux 2009                              |
| 463   | 1388 A>G<br>1387-1392            |                 |              | <i>N→S</i><br>del                      |                | Vietnam                                                                                                                                                                                              | Bertaux 2009                              |
| 465** | 1395 T>C<br>1395 A>G             | AAT             | AAC<br>AGC   | <i>N→N</i><br><i>N→S</i>               |                | French Guiana <sup>#</sup><br>Vietnam                                                                                                                                                                | this work<br>Bertaux 2009                 |
| 466   | 1397 G>A                         | AGT             | AAT          | S→N                                    | HB3            | Honduras                                                                                                                                                                                             | Tanabe 2004                               |
| 537   | C>A                              | GAC             | GAT          | <i>D→D</i>                             |                | Niger                                                                                                                                                                                                | Ibrahim 2009                              |
| 538   | 1612 A>C<br>1614 T>C             | AGT             | CGT<br>AGC   | S→R<br>S→S                             |                | French Guiana <sup>#</sup>                                                                                                                                                                           | this work                                 |
| 539   | 1616 C>T                         | ACC             | ATC          | T→I                                    |                | French Guiana <sup>#</sup>                                                                                                                                                                           | this work                                 |
| 557   | 1671 T>A                         | TCT             | TCA          | S→S                                    |                | Equatorial Guinea <sup>#</sup>                                                                                                                                                                       | this work                                 |
| 561   | A>T                              | AAA             | AAT          | K→N                                    |                | Niger                                                                                                                                                                                                | Ibrahim 2009                              |
| 569** | 1706 A>G<br>1706 A>T<br>1707 T>A | AAT             | AGT<br>AAA   | <i>N→S</i><br><i>N→I</i><br><i>N→K</i> |                | French Guiana <sup>#</sup><br>Zanzibar<br>Papua New Guinea,                                                                                                                                          | this work<br>Dahlström 2008               |

|       |                      |     |            |            |                                                              |                                                                 |
|-------|----------------------|-----|------------|------------|--------------------------------------------------------------|-----------------------------------------------------------------|
|       |                      |     |            |            | Gambia, Zanzibar,<br>Malawi, Tanzania<br>Sudan,<br>Niger     | Ibrahim 2009                                                    |
| 570** | 1710 A>C             | ACA | ACC        | T→T        | French Guiana <sup>#</sup>                                   | this work                                                       |
| 574** | 1721 A>C             | CAA | CCA        | Q→P        | French Guiana <sup>#</sup>                                   | this work                                                       |
| 585   | 1754 G>A             | GGT | GAT        | G→D        | Zanzibar                                                     | Dahlström 2008                                                  |
| 602   | 1805 C>T             | ACA | ATA        | T→I        | Zanzibar                                                     | Dahlström 2008                                                  |
| 610   | 1828 T>A             | TTA | ATA        | L→I        | Zanzibar                                                     | Dahlström 2008                                                  |
| 611   | 1833 G>T             | AAG | AAT        | K→N        | Zanzibar                                                     | Dahlström 2008                                                  |
| 612   | 1834 A>T             | AAT | TAT        | N→Y        | Zanzibar                                                     | Dahlström 2008                                                  |
| 621** | 1861 G>T<br>1862 C>A | GCT | TCT<br>GAT | A→S<br>A→D | French Guiana <sup>#</sup><br>Zanzibar                       | this work<br>Dahlström 2008                                     |
| 623** | 1867 G>A<br>1868 C>A | GCA | ACA<br>GAA | A→T<br>A→E | Zanzibar<br>Senegal <sup>#</sup> , Senegal                   | Dahlström 2008<br>Menegon 2008                                  |
| 630** | 1888 G>T             | GCT | TCT        | A→S        | Brazil <sup>#</sup><br>Zanzibar, Tanzania<br>Angola<br>Niger | this work<br>Dahlström 2008<br>Menegon 2008<br>Ibrahim 2009     |
| 632   | 1895 G>A             | GGA | GAA        | G→E        | Zanzibar                                                     | Dahlström 2008                                                  |
| 635   | 1903 A>G<br>1904 C>A | ACA | GCA<br>AAA | T→A<br>T→K | Zanzibar                                                     | Dahlström 2008                                                  |
| 637   | 1910 A>G             | GAG | GGG        | E→G        | Zanzibar                                                     | Dahlström 2008                                                  |
| 639** | 1916 G>A             | GGC | GAC        | G→D        | 7G8<br>Brazil<br>Brazil<br>Niger<br>Zanzibar                 | Tanabe 2004;<br>Ferreira 2008<br>Ibrahim 2009<br>Dahlström 2008 |
| 641   | 1921 A>G             | AGT | GGT        | S→G        | Zanzibar                                                     | Dahlström 2008                                                  |
| 643** | 1927 G>C             | GAA | CAA        | E→Q        | Equatorial Guinea <sup>#</sup><br>Zanzibar                   | this work<br>Dahlström 2008                                     |
| 644   | 1931 A>T             | AAT | ATT        | N→I        | Zanzibar                                                     | Dahlström 2008                                                  |
| 649   | 1945 A>G             | AAA | GAA        | K→E        | Zanzibar                                                     | Dahlström 2008                                                  |
| 683   | 2049 T>G             | AAT | AAG        | N→K        | Senegal <sup>#</sup><br>Senegal<br>Cambodia<br>Vietnam       | this work<br>Menegon 2008<br>Dahlström 2008<br>Bertaux 2009     |
| 723   | 2167 A>G             | ATA | GTA        | I→V        | Zanzibar                                                     | Dahlström 2008                                                  |
| 747   | 2239 C>T<br>2240 A>G | CAT | TAT<br>CGT | H→Y<br>H→R | Zanzibar<br>Zanzibar                                         | Dahlström 2008                                                  |
| 756   | 2268 A>G             | AGA | AGG        | R→R        | Vanuatu                                                      | Dahlström 2008                                                  |
| 758   | 2274 A>G             | TTA | TTG        | L→L        | Zanzibar                                                     | Dahlström 2008                                                  |
| 769   | 2306 G>A             | AGT | AAT        | S→N        | French Guiana <sup>#</sup><br>?                              | Jambou, 2005<br>Cojean 2006                                     |
| 771   | 2311 A>G             | AAA | GAA        | K→E        | Angola, Ghana, Niger                                         | Menegon 2008                                                    |
| 776   | 2328 G>T             | AAG | AAT        | K→N        | China                                                        | Menegon 2008                                                    |
| 783   | 2347 A>G             | AAA | GAA        | K→E        | Zanzibar                                                     | Dahlström 2008                                                  |
| 801   | 2403 T>C             | CGT | CGC        | R→R        | Zanzibar                                                     | Dahlström 2008                                                  |
| 809   | 2425 A>G             | AGA | GGA        | R→G        | Zanzibar                                                     | Dahlström 2008                                                  |

|       |          |     |     |     |     |                                            |               |
|-------|----------|-----|-----|-----|-----|--------------------------------------------|---------------|
| 844   | 2530-2   | GGA | del | G→- | HB3 | Honduras                                   | Tanabe 2004   |
| 885*  | 2656 T>A | ATT | ATA | I→I |     | Senegal <sup>#</sup>                       | this work     |
| 898*  | 2694 T>A | ATT | ATA | I→I |     | Brazil <sup>#</sup>                        | this work     |
|       |          |     |     |     |     | Cambodia <sup>#</sup>                      | this work     |
|       |          |     |     |     |     | Brazil <sup>#</sup>                        | Ferreira 2007 |
|       |          |     |     |     |     | Vietnam                                    | Bertaux 2009  |
| 959   | 2877 T>A | ATT | ATA | I→I |     | Cambodia <sup>#</sup>                      | this work     |
| 987   | 2960 A>C | ATT | CTT | I→T |     | Senegal <sup>#</sup>                       | this work     |
|       | 2962 T>A |     | ATA | I→I |     | Cambodia <sup>#</sup>                      |               |
| 998   | 2974 T>C | AGT | AGC | S→S |     | Senegal <sup>#</sup>                       | this work     |
| 1030  | 3090 G>A | AAG | AAA | K→K |     | Cambodia <sup>#</sup>                      | this work     |
| 1031* | 3093 C>T | TGC | TGT | C→C |     | Senegal <sup>#</sup> Cambodia <sup>#</sup> | this work     |
|       |          |     |     |     |     | Vietnam                                    | Bertaux 2009  |

Legend:

\*\*Plasmodium specific area : AA 407-486, 569-671, 852-860

# this work

references

1. Tanabe K, Sakihama N, Hattori T, Ranford-Cartwright L, Goldman I, et al (2004) Genetic distance in housekeeping genes between *Plasmodium falciparum* and *Plasmodium reichenowi* and within *P. falciparum*. *J Mol Evol* 59: 687-94.
2. Ferreira ID, Lopes D, Martinelli A, Ferreira C, do Rosário VE, Cravo P. In vitro assessment of artesunate, artemether and amodiaquine susceptibility and molecular analysis of putative resistance-associated mutations of *Plasmodium falciparum* from São Tomé and Príncipe. *Trop Med Int Health*. 2007 Mar;12(3):353-62.
3. Price RN, Uhlemann AC, Brockman A, McGready R, Ashley E, Phaipun L, Patel R, Laing K, Looareesuwan S, White NJ, Nosten F, Krishna S. Mefloquine resistance in *Plasmodium falciparum* and increased *pfmdr1* gene copy number. *Lancet*. 2004 Jul 31-Aug 6;364(9432):438-47. PMID: 15288742
4. Bertaux L, Quang le H, Sinou V, Thanh NX, Parzy D. New PfATP6 mutations found in *Plasmodium falciparum* isolates from Vietnam. *Antimicrob Agents Chemother*. 2009 Oct;53(10):4570-1.
5. Dahlström S, Veiga MI, Ferreira P, Mårtensson A, Kaneko A, et al (2008) Diversity of the sarco/endoplasmic reticulum Ca(2+)-ATPase orthologue of *Plasmodium falciparum* (PfATP6). *Infect Genet Evol* 8: 340-5.
6. Menegon M, Sannella AR, Majori G, Severini C. Detection of novel point mutations in the *Plasmodium falciparum* ATPase6 candidate gene for resistance to artemisinins. *Parasitol Int*. 2008 Jun;57(2):233-5.
7. Ibrahim ML, Khim N, Adam HH, Arie F, Duchemin JB (2009) Polymorphism of PfATPase in Niger: detection of three new point mutations. *Malar J* 8:28.
8. Jambou R, Legrand E, Niang M, Khim N, Lim P, et al (2005) Resistance of *Plasmodium falciparum* field isolates to in-vitro artemether and point mutations of the SERCA-type PfATPase6. *Lancet* 366: 1960-1963
9. Cojean S, Hubert V, Le Bras J, Durand R (2006) Resistance to dihydroartemisinin. *Emerg Infect Dis* 12: 1798-9.
